# Supplementary material for: Facile synthesis of urchin-like RuCu and hollow RuCuMo nanoparticles and preliminary insight to their formation process by cyclic voltammetry
Source: Royal Society of Chemistry journal article supplement (doi:10.1039/c8ra01261j), 2018-01-01
Supplement: c8ra01261j1.pdf [file c8ra01261j1.pdf]

## Electronic Supplementary Information

### Facile synthesis of urchin-like RuCu and hollow RuCuMo nanoparticles and preliminary insight to their formation process by cyclic voltammetry

Yanna Song<sup>a</sup>, Jingcheng Sun<sup>a</sup>, Yanru Zhang<sup>a</sup>, Bingxin Wang<sup>a</sup>, Qiang Li<sup>\*c</sup> and Yongming Fan<sup>\*ab</sup>

<sup>a</sup> MOE Engineering Research Center of Forestry Biomass Materials and Bioenergy, Beijing Forestry University, Beijing, 100083, China

<sup>b</sup> Key Laboratory of Lignocellulosic Chemistry, Beijing Forestry University, Beijing, 100083, China

<sup>c</sup> College of Science, Beijing Forestry University, Beijing 100083, China

\* Correspondence: liqiang@bjfu.edu.cn (Q. L.); fanym@bjfu.edu.cn (Y. M.);

Tel. +86-137-18679671 (Q. L.); +86-185-15301003 (Y. M.)

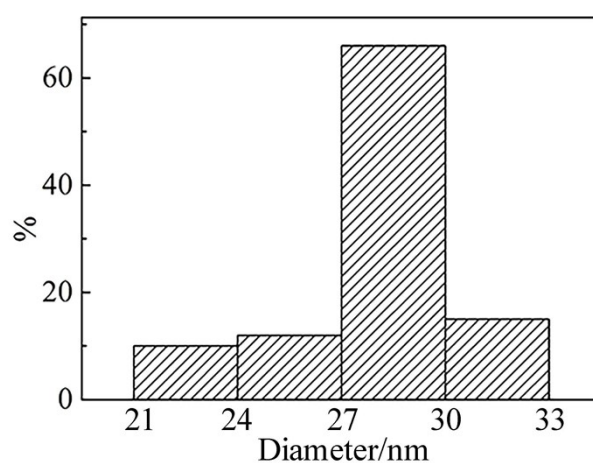

**Fig. S1** Size distribution of the urchin-like RuCu nanoparticles in Fig. 1(a).

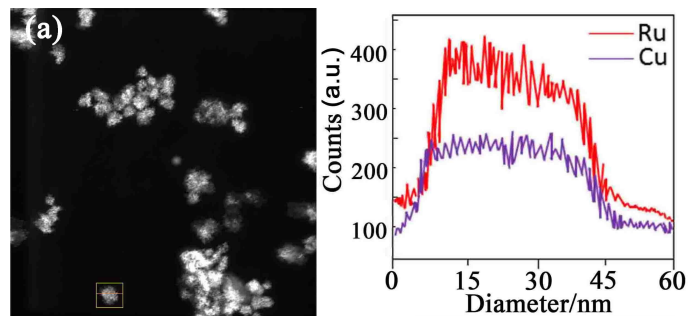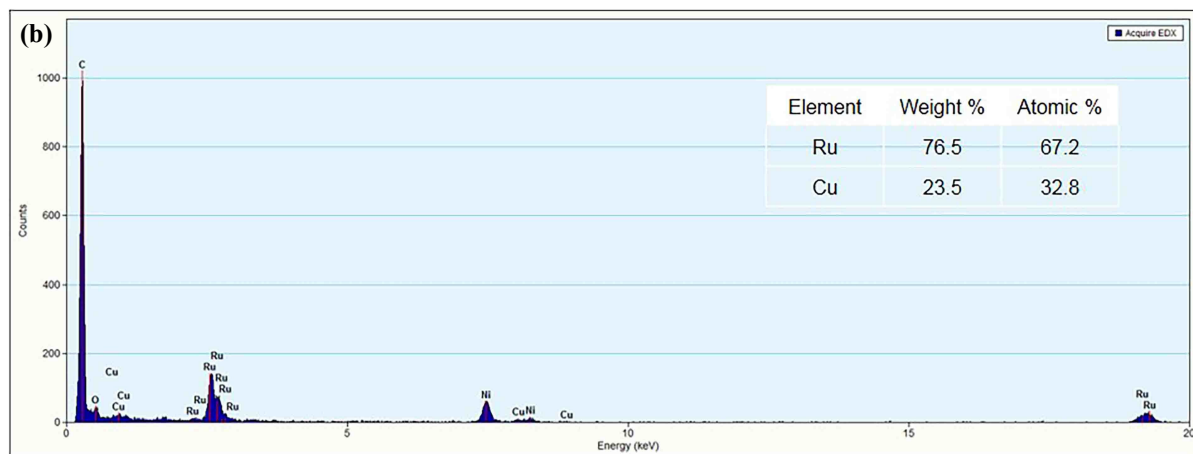

**Fig. S2** (a) The cross-sectional compositional line profiles of urchin-like RuCu nanoparticles; (b) EDX patterns of RuCu NPs.

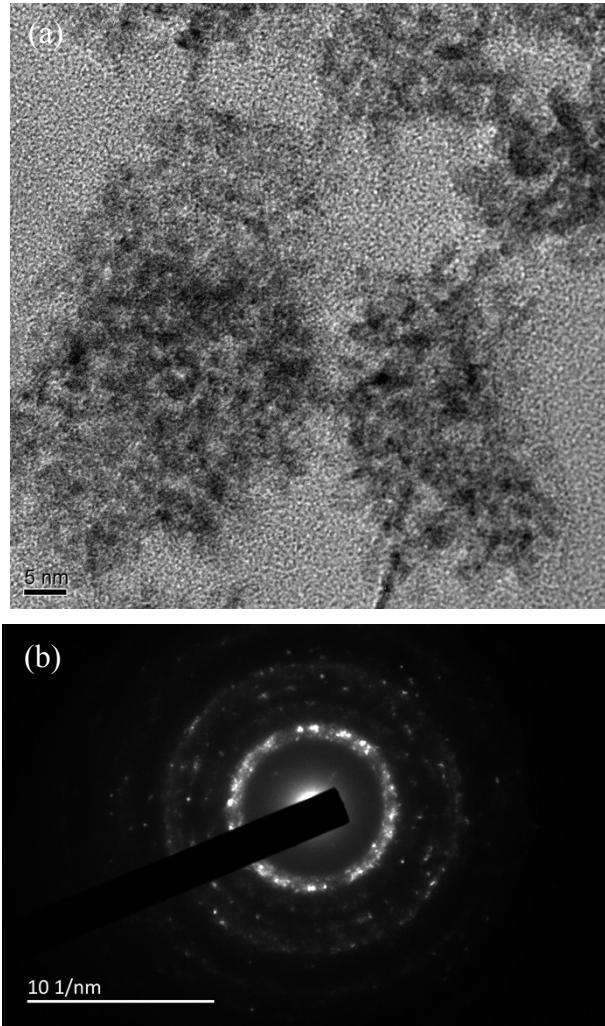

**Fig. S3** (a) HRTEM images and (b) SAED image of RuCu NPs.

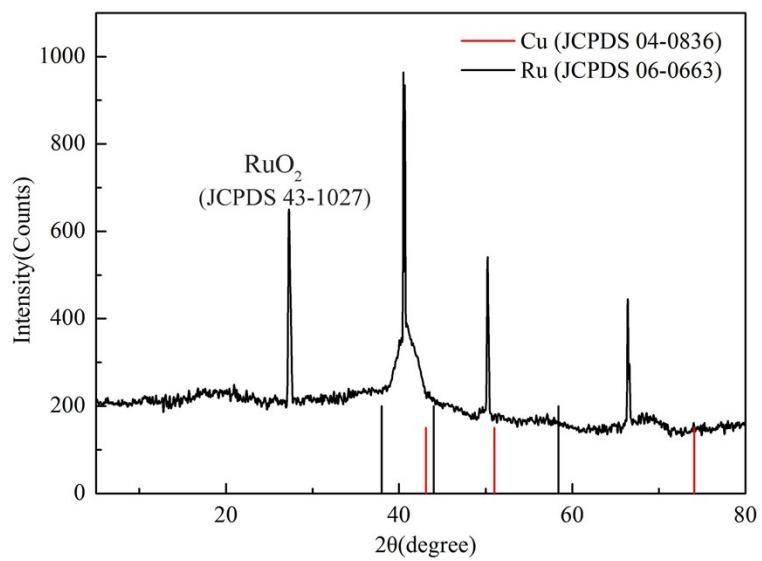

**Fig. S4** XRD pattern of RuCu NPs.

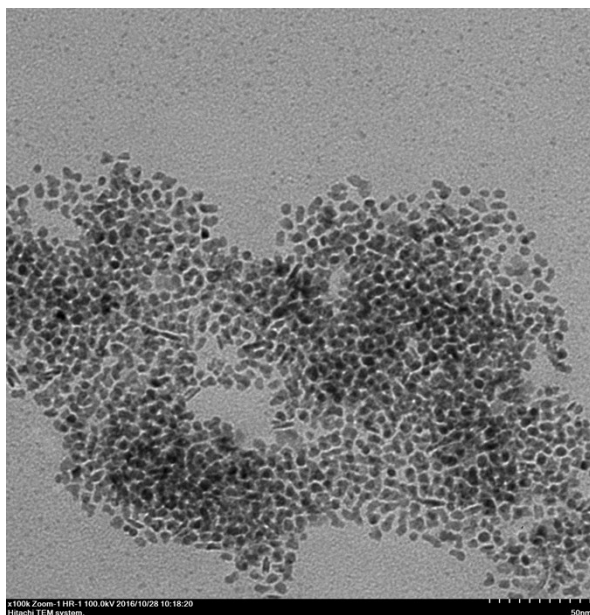

**Fig. S5** The TEM images of NPs in only Ru precursor system.

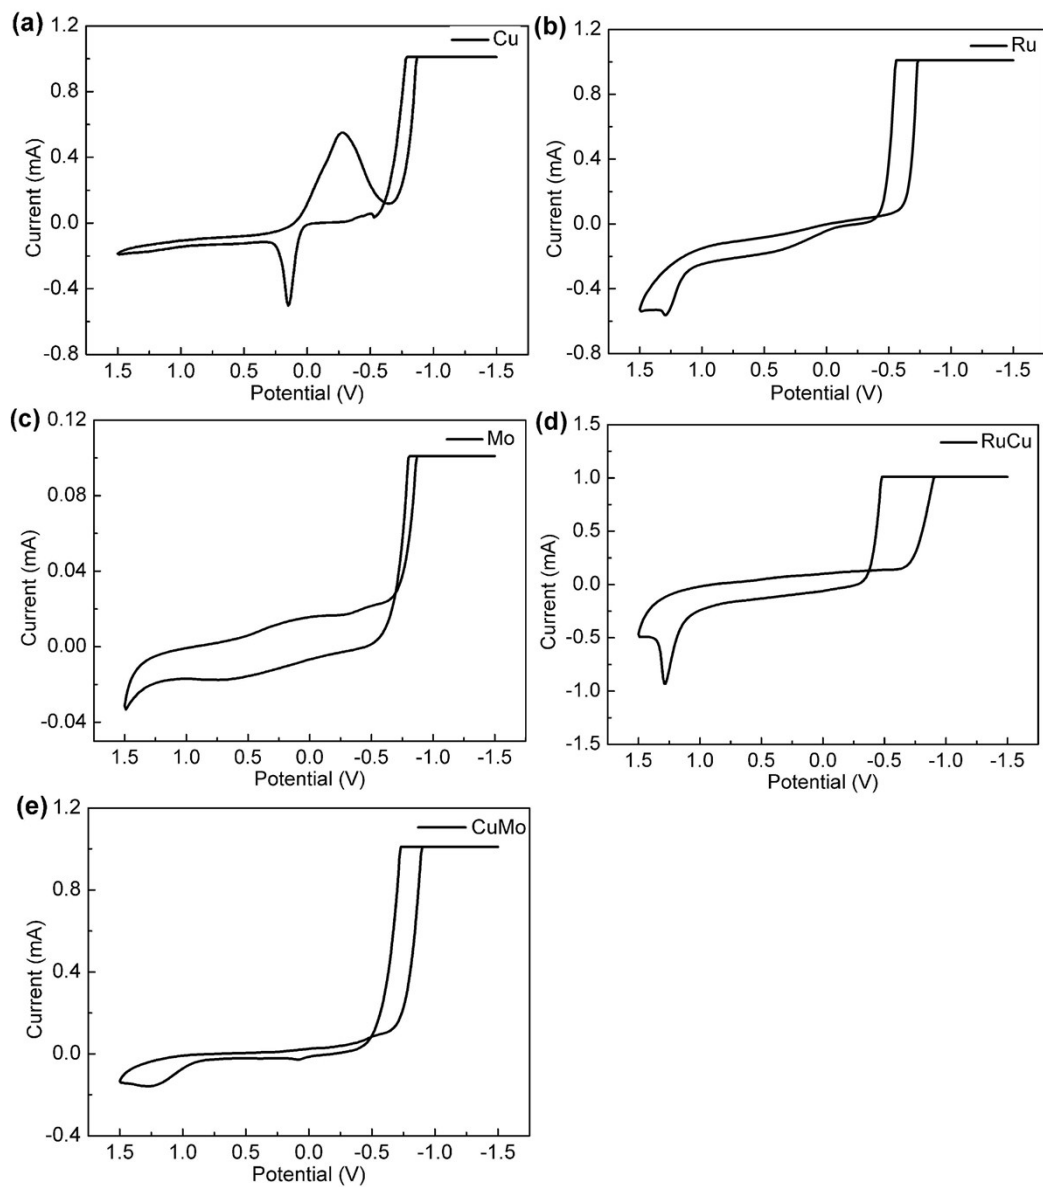

**Fig. S6** The CV curves of different nanomaterials (a) Cu single metal nanomaterials; (b) Ru single metal nanomaterials; (c) Mo single metal nanomaterials; (d) RuCu bimetallic nanomaterials; (e) CuMo bimetallic nanomaterials.

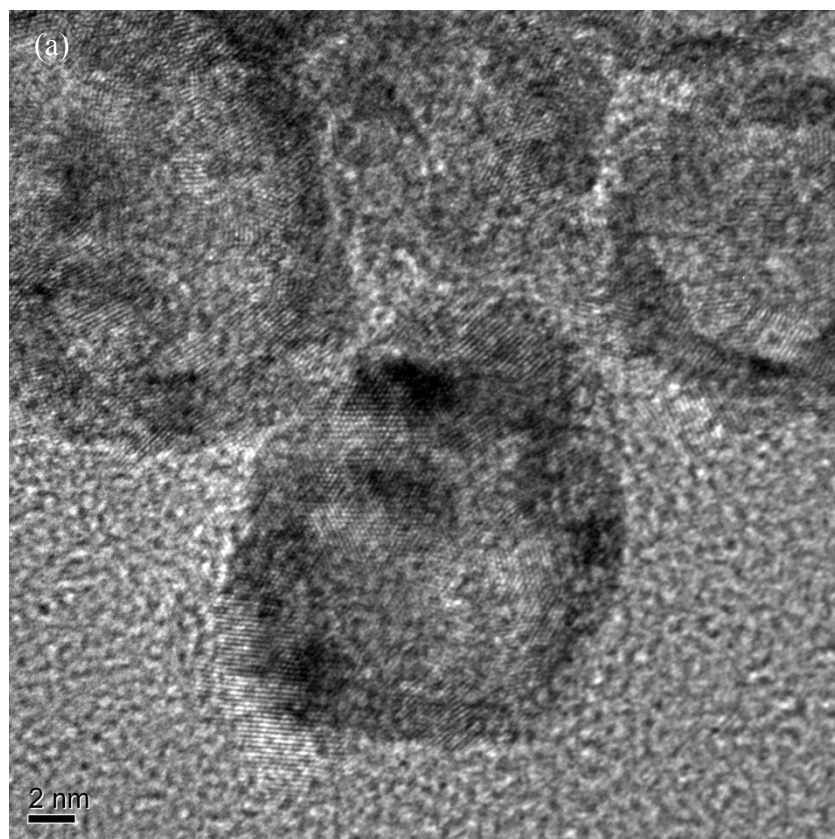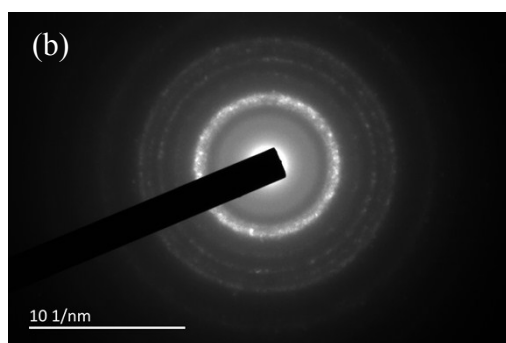

**Fig. S7** (a) HRTEM images and (b) SAED image of RuCuMo NPs.

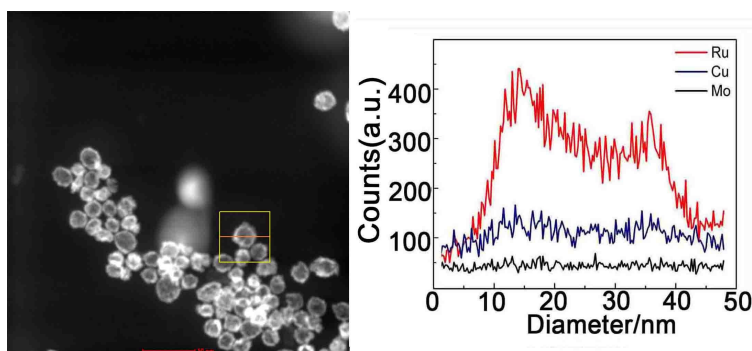

**Fig. S8** The cross-sectional compositional line profiles of hollow RuCuMo nanoparticles.

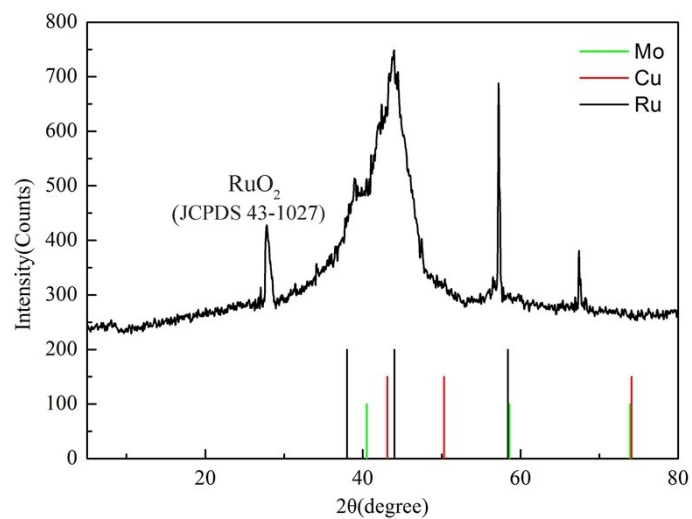

**Fig. S9** XRD pattern of RuCuMo NPs.

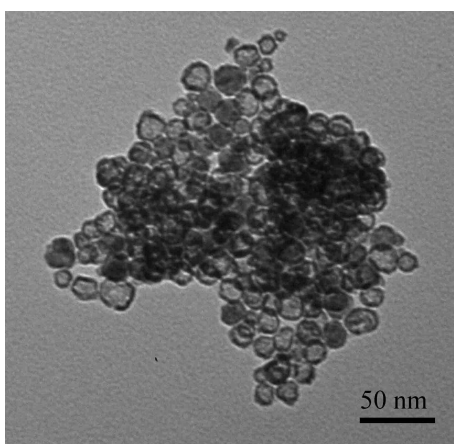

**Fig. S10** The TEM image of RuCuMo NPs prepared without PVP in the system.

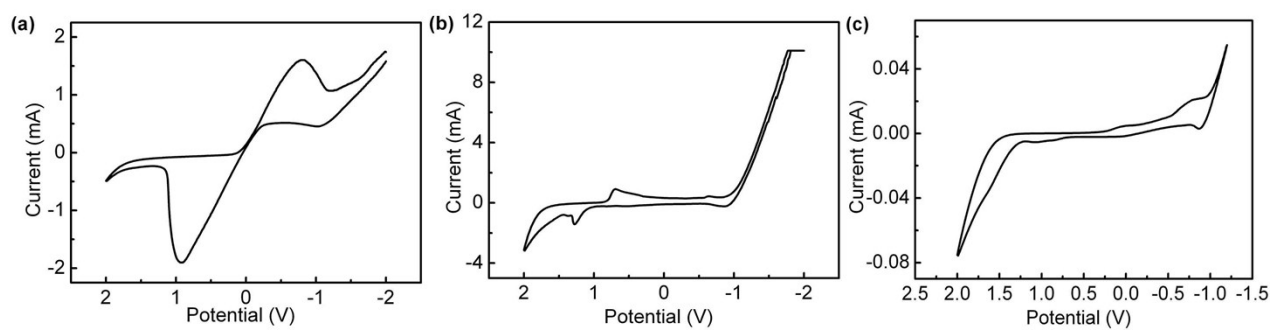

**Fig. S11** The electrode potential of single (a) Cu; (b) Ru; (c) Mo in the solution.
